# Supplementary material for: An Adult Brain Atlas Reveals Broad Neuroanatomical Changes in Independently Evolved Populations of Mexican Cavefish
Source: Front Neuroanat. 2019 Oct 4;13:88. doi: 10.3389/fnana.2019.00088 (PMC6788135; doi:10.3389/fnana.2019.00088)
Supplement: Supplementary file 13 [file Table_1.XLSX]

## Sheet: Table 1
TABLE 1. Fish metrics
Population	Individual	Sex	Body length (mm)	Weight (g)	Volume of entire brain (mm^3) (not standardized)	Volume of entire brain/length of fish	Slices per brain
Surface	1	Male	44.26	1.73	6.029	0.136	424
Surface	2	Female	46.15	2.01	6.93	0.15	533
Pachon	1	Female	50.21	3.04	6.49	0.129	650
Pachon	2	Male	48	2.53	9.05	0.189	614
Tinaja	1	Male	45.11	2.22	4.92	0.109	451
Tinaja	2	Female	48.17	2.75	6.003	0.125	667
Tinaja	3	Female	47.86	2.64	15.86	0.331	728
Molino	1	Female	45.64	2.09	6.712	0.147	591
Molino	2	Male	39.8	1.34	4.97	0.125	537
